# Supplementary material for: Rattle type α-Fe2O3 submicron spheres with a thin carbon layer for lithium-ion battery anodes
Source: Royal Society of Chemistry journal article supplement (doi:10.1039/c3ta11852e), 2013-01-01
Supplement: c3ta11852e.pdf [file c3ta11852e.pdf]

## Supporting Information

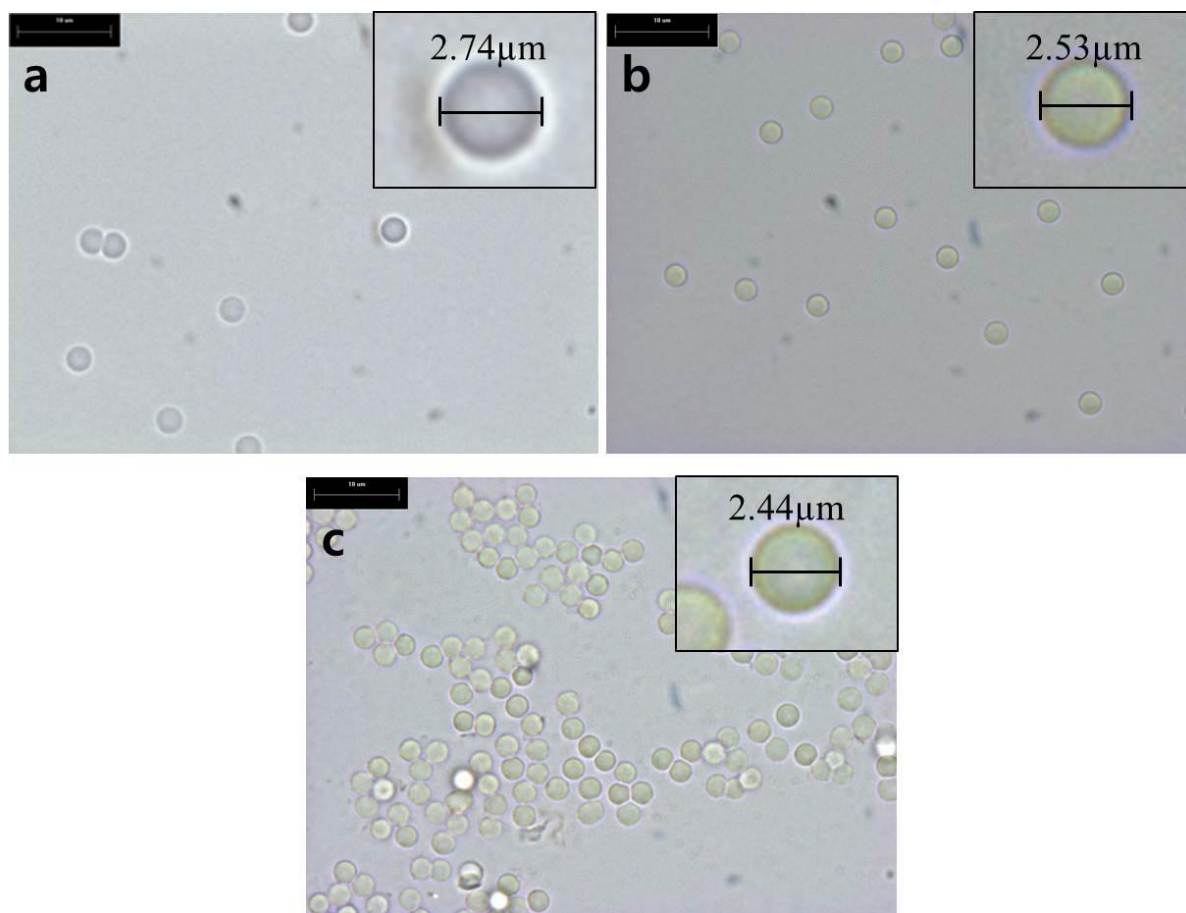

### Figure S1

**Figure S1.** OM images of the synthetic process for Fe metal precursor/poly(MAA/EGDMA) composite microspheres: (a) swollen poly(MAA/EGDMA) microspheres, (b) after adding FeSO<sub>4</sub>·7H<sub>2</sub>O (c) after stirring for 12h with reduction agent.

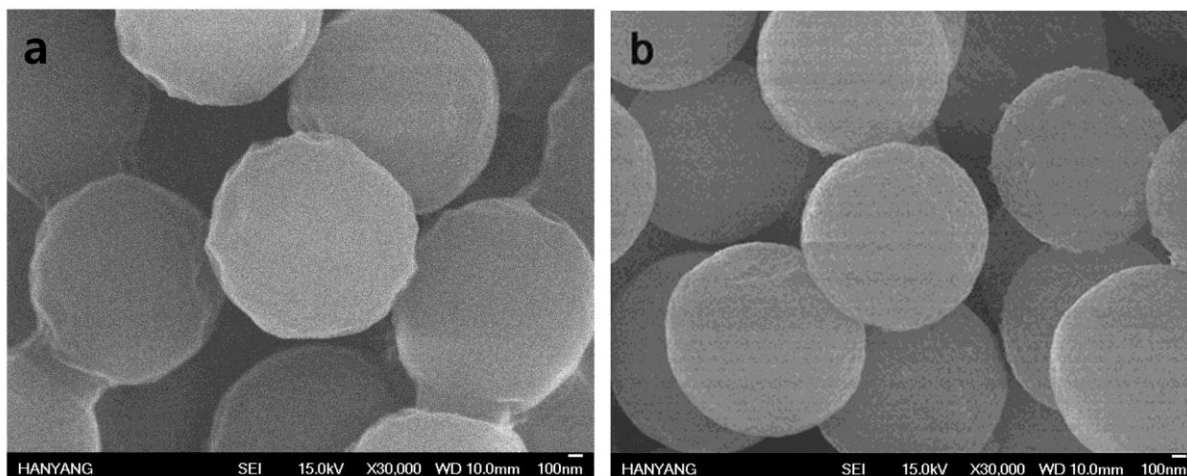

## Figure S2

**Figure S2.** SEM images of (a) poly(MAA/EGDMA) microspheres and (b) Fe metal precursor/poly(MAA/EGDMA) composite microspheres.

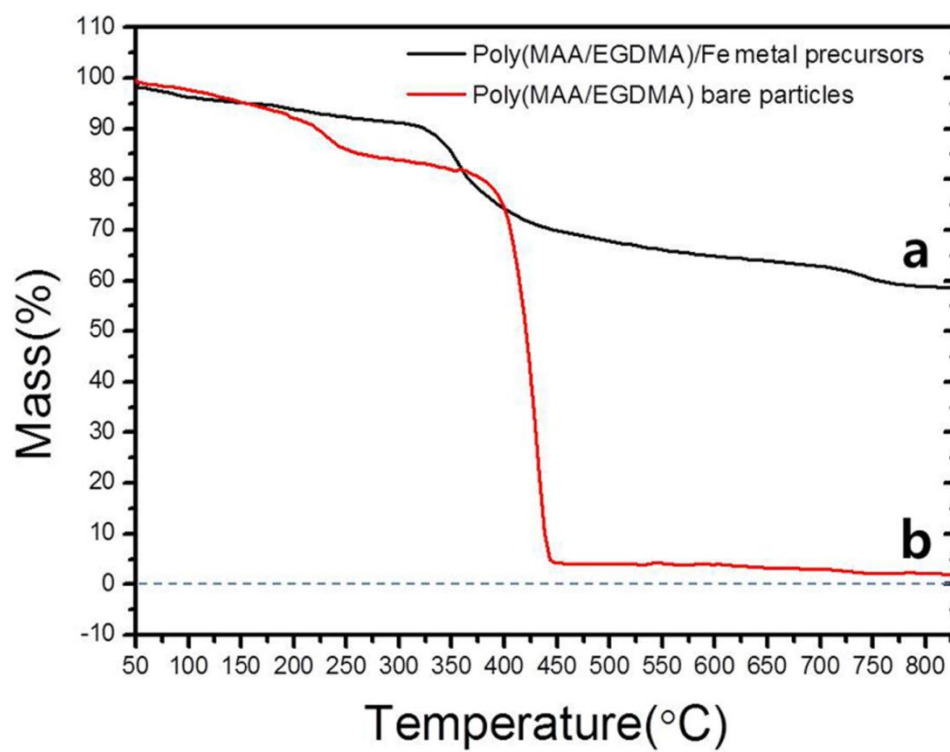

## Figure S3

Figure S3. TGA curves of (a) Fe metal precursors/poly(MAA/EGDMA) composite microspheres and (b) poly(MAA/EGDMA) microspheres.

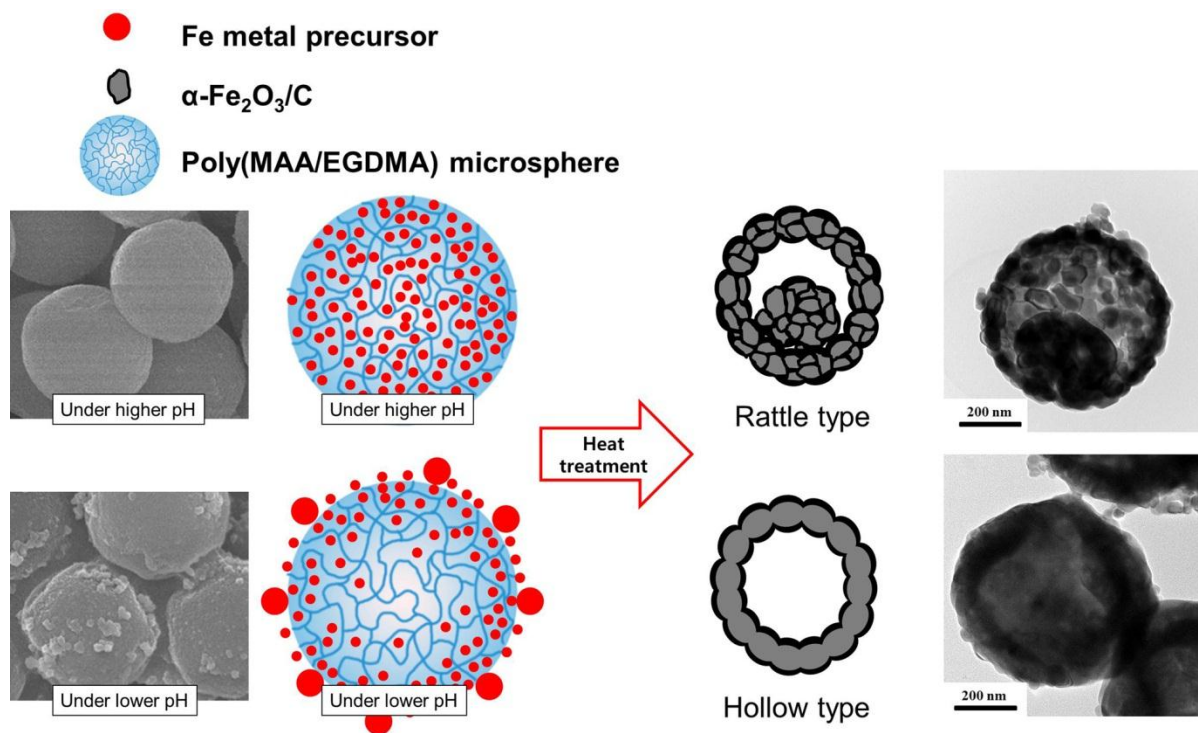

## Figure S4

Figure S4. (c) Schematic illustration of formation process of hollow and rattle-type  $\text{Fe}_2\text{O}_3/\text{C}$  submicron spheres by heat treatment. SEM images of Fe metal precursors/poly(MAA/EGDMA) microspheres prepared under different pH ((a) 7.05 and (b) 6.07) value of exterior solution and TEM images of two types of  $\text{Fe}_2\text{O}_3/\text{C}$  ((d) rattle and (e) hollow) submicron spheres after heat treatment.

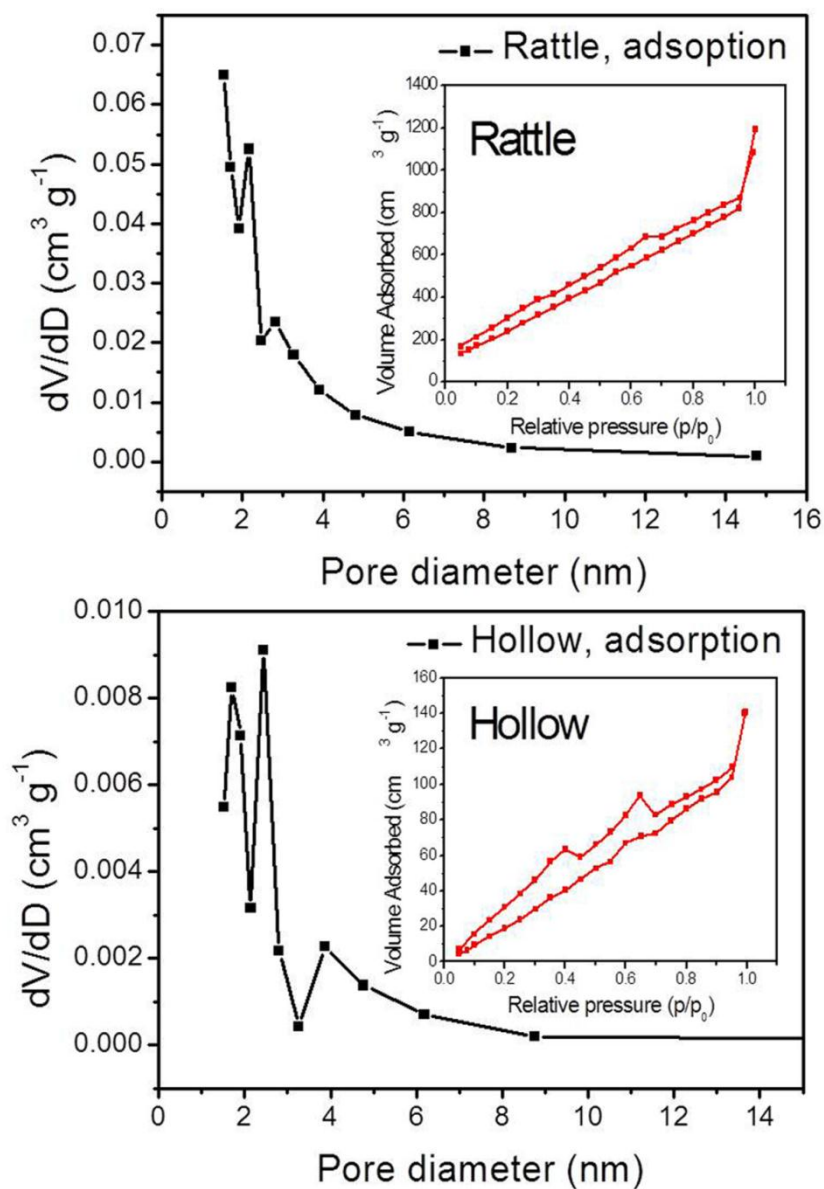

**Figure S5**

Figure S5. Pore size distribution and the nitrogen sorption isotherms (insets) of the hollow and rattle-type  $\alpha\text{-Fe}_2\text{O}_3/\text{C}$  submicron spheres

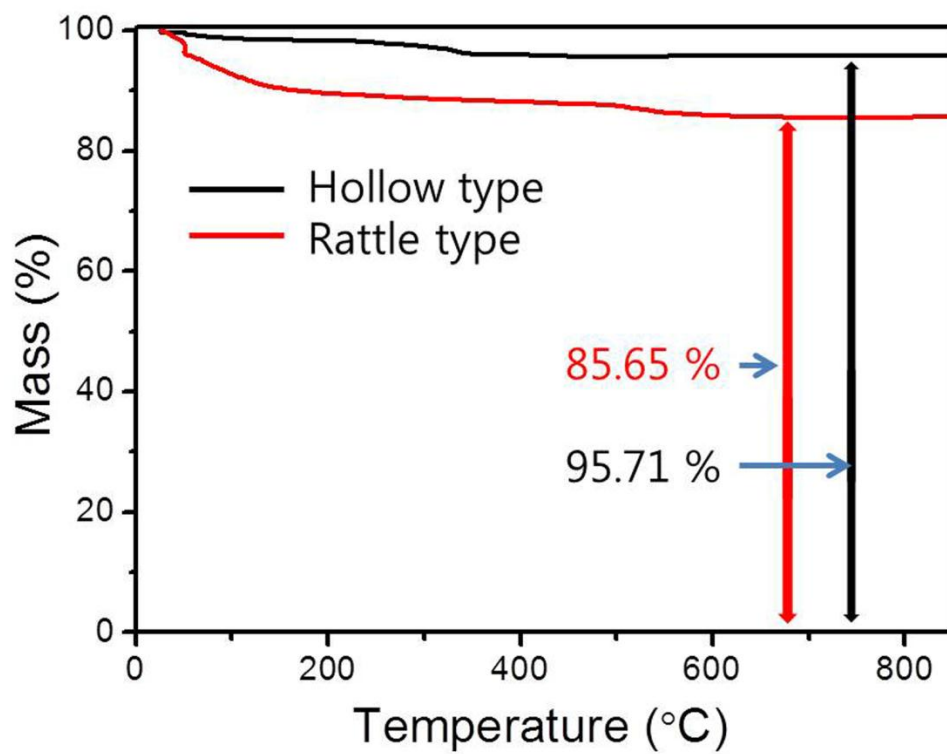

**Figure S6**

Figure S6. TGA curves of the hollow and rattle-type  $\alpha$ -Fe<sub>2</sub>O<sub>3</sub>/C submicron spheres with air flow at a heating rate of 5°C min<sup>-1</sup>.
